# Organization Section

The following were elected to the Professional Section as of September 1988:

Mohammed N. Abdullah, MD, New Orleans, LA  
N. Adamafio, PhD, Ann Arbor, MI  
Thomas G. Ahn, MD, Los Angeles, CA  
Amelia Amaro, MD, Mexico  
Judy A. Anderson, RN, Detroit, MI  
Michelle Atkins, Phoenix, AZ  
John A. Baima, Rockville, MD  
Mary Zoe Baker, MD, Oklahoma City, OK  
Randall Ball, Phoenix, AZ  
L. J. Baylis, DPM, Oakmont, PA  
Gerald W. Bean, San Antonio, TX  
Albert Berenstein, DPM, West Nyack, NY  
Randy H. Bernstein, DPM, Southfield, MI  
Tarek Bisat, MD, Macon, GA  
Jennifer Blair, RN, PHN, MPH, Rapid City, SD  
Deanna Bland, RN, BS, CDE, Tucson, AZ  
Lois Bonner, RN, Riverside, CA  
Raymond E. Bourey, MD, St. Louis, MO  
Ronald Brown, MD, Oklahoma City, OK  
Melanie J. Brunt, MD, Brookline, MA  
Vivian Ann Burriss, RN, CDE, Charlotte, NC  
Karsten Buschard, MD, Copenhagen, Denmark  
David Camp, Austin, TX  
Patricia Cane, PhD, Sylmar, CA  
Maria Carosa, Cherry Hill, NJ  
Paula L. Centruelli, Somerville, NJ  
Christine P. Chan, PhD, East Hanover, NJ  
Sioksoan Chan-Cua, MD, San Diego, CA  
Brett Charlton, PhD, Sydney, NSW, Australia  
Jyoti Chattopaohyay, PhD, Austin, MN  
Elizabeth Choate, RD, Mayfield, KY  
Teresa Choate, RN, CDE, Bethesda, MD  
David W. Clough, PhD, Chicago, IL  
Bocile Fay Cole, RN, Marrero, LA  
Joanne Conlin-Kurylas, RN, Northport, NY  
Silvia Corvera, MD, Philadelphia, PA  
Anne Costis, RN, Norfolk, VA  
Sherie Courchaine, Gwin, MI

Betty M. Covarrubias, RN, BSN, Tampa, FL  
Judith Creba, PhD, Macclesfield, Cheshire, UK  
Frank DeStefano, MD, Atlanta, GA  
Sherin Devaskar, MD, St. Louis, MO  
Jay E. Diamond, St. Louis, MO  
James Jay Doherty, III, Montreal, Quebec, Canada  
L. L. Dotto, PhD, Roxboro, Quebec, Canada  
Cyndi Drake, West Palm Beach, FL  
Heinz Drexel, MD, Innsbruck, Austria  
Patrick Driscoll, PhD, Bedford, MA  
Michael Stephen Drohsky, BS, Philadelphia, PA  
Homer J. Dupuy, III, New Orleans, LA  
Steve L. Durfee, PhD, Denver, CO  
Mary W. Edge, RN, St. Simons Island, GA  
Jean-Marie Ekoe, MD, Longueuil, Quebec, Canada  
Imad El-Kebbi, MD, Atlanta, GA  
A. Frances Elliott, West Chester, PA  
Patricia D. Elliott, San Diego, CA  
Jeffrey W. Ellis, MD, Oakbrook Terrace, IL  
Wayne A. Evron, MD, Pittsburgh, PA  
Charles Ellis Fisher, MD, Los Angeles, CA  
Mollie H. Fitzgerald, New York, NY  
Paul J. Flakoll, PhD, Nashville, TN  
Diana Ford, St. Petersburg, FL  
Diane Fowler, RN, Lake Charles, LA  
Julia A. Fruth, Columbia, MO  
David A. Fryburg, MD, Hamden, CT  
Carmen Fuscaldo, MD, San José, Costa Rica  
Galimberti Gabriella, MD, Milan, Italy  
John Patrick Galgam, Jr., MD, St. Louis, MO  
Alfredo Garcia, MD, Haringen, TX  
Juan M. Garles, MD, Coral Gables, FL  
Susan Gibson, Dorval, Quebec, Canada  
Alan Paul Glombicki, MD, Houston, TX  
Ssoeholm Goesta, Ereroe, Sweden  
Jack Goldstein, Los Angeles, CA  
Steven Goldstein, PhD, Atlanta, GA  
Carsten F. Gotfredsen, MSc, DrSc, Bagsvaerd, Denmark

- Karen M. Goya, MT, Glendale, CA  
 Mate Granic', MD, PhD, Zagreb, Yugoslavia  
 Jerry Grass, Nashville, TN  
 Mirjana Gulan, MD, Kirchwes, Ontario, Canada  
 Mark Gutniak, MD, PhD, Stockholm, Sweden  
 Judith Lynn Hamet, Plantation, FL  
 Chip John Hamilton Reed, MD, Atlanta, GA  
 Nancy Harris, RD, Greenville, NC  
 Celeste B. Hart, MD, Washington, DC  
 Carol R. Havdel, Laplace, LA  
 Terri Hensley, RN, Pembroke Pines, FL  
 Emily Holing, RN, Bellevue, WA  
 Jane T. Horton-Marcella, MD, Lexington, KY  
 Kinga Howorka, MD, Vienna, Austria  
 Gesnot Huber, Vienna, Austria  
 Ann Hurley, Brookline, MA  
 Schail Inam, MRCP, Riyadh, Saudi Arabia  
 Judith Iobst, RN, Emmanus, PA  
 Jun Ishii, MD, PhD, Irumagun, Saitama, Japan  
 Rozmin Jamal, Calgary, Alberta, Canada  
 Jan Trost Jorgensen, MSc, Gentofte, Denmark  
 Joni K. Kalis, Tucson, AZ  
 Huldrick Kamner, MD, Portland, OR  
 Matthew S. Kane, MD, Philadelphia, PA  
 Kory M. Kazarian, BS, San Antonio, TX  
 Lynda Kendall, RN, MSN, Great Falls, MT  
 James J. Kloczek, BS, Philadelphia, PA  
 Jane M. Korducki, MD, Rochester, MN  
 Robert L. Kroc, PhD, Santa Barbara, CA  
 Jane Ann Kuehl, Houston, TX  
 Daniel A. Lang, MD, Chicago, IL  
 Mary Ellen Langone-Lackaye, RN, New York, NY  
 Maria LaRosa, Cherry Hill, NJ  
 Rosalie A. LaVon, MD, Norman, OK  
 Kevin Lawlor, Drexel Hill, PA  
 David E. Lebwohl, MD, New York, NY  
 Charlotte Lee, RN, CDE, Birmingham, AL  
 Sarah A. Lee, RN, BSN, Trussville, AL  
 Ben R. Leedle, Jr., Wichita, KS  
 Sam Lerman, MD, Montreal, Quebec, Canada  
 Wing-Kay Leung, MD, Taipei, Taiwan  
 Charles D. Levit, MD, New York, NY  
 Judy E. Levy, RN, Gaithersburg, MD  
 Eunice A. Lewis, RD, Brooklyn, NY  
 Maria Cristina Librenti, MD, Basiglio (Milan), Italy  
 Hun-Chi Lin, PhD, Los Angeles, CA  
 Kurt Link, MD, Richmond, VA  
 Folke Lithner, MD, PhD, Umea, Sweden  
 Lisa M. Loeb, Houston, TX  
 Lusiana Loman, MD, New Port Richey, FL  
 Robert Ludlow, Gainesville, FL  
 Tami Jo Lyon, MPH, RD, Los Angeles, CA  
 Dorothy Mallory, RN, Whitehead, British Columbia, Canada  
 Mary Lou Maras, RD, CDE, Washington, DC  
 Joseph W. Marin, Fair Oaks, CA  
 Louis F. Martin, MD, Hershey, PA  
 Buscema Massimo, MD, London, UK  
 Elizabeth J. Mayer, MS, Denver, CO  
 Theodore Mazzone, MD, Chicago, IL  
 Michele McDermott, MD, Houston, TX  
 David W. McGregor, RN, CPQA, Chalmette, LA  
 E. Kelly McLaughlin, DPM, N. Attleboro, MA  
 Larry McNeil, MD, Nashville, TN  
 Mary Mead, San Francisco, CA  
 Linda J. Million, RN, CDE, Charlotte, NC  
 Egbert Miranda, MD, Jefferson, LA  
 Reeta Misra, MD, Nashville, TN  
 John A. Moorhouse, MD, MSc, FRCP, FACP, Winnipeg, Manitoba, Canada  
 Juz Marina Morales, RD, MSc, Maracaibo, Venezuela  
 James Morter, PhD, St. Louis, MO  
 Larry Gene Moss, MD, San Francisco, CA  
 Neal A. Mozen, DPM, Southfield, MI  
 Penny S. Murphy, RD, LD, CDE, San Antonio, TX  
 Kenichiro Nakao, Yokohama, Japan  
 Beth Nardacci, RN, MS, CDE, Albany, NY  
 Joseph Newman, Colorado Springs, CO  
 Robert A. Noonan, PhD, Alameda, CA  
 Nursing Wellness Center, Tucson, AZ  
 Olutoyin A. Okundren, RD, Memphis, TN  
 Caroline S. Pace, PhD, Birmingham, AL  
 Giovanni Pacini, Padua, Italy  
 Harry Palter, MD, Willoceaalt, Ontario, Canada  
 Mavrizio Para, PhD, Padua, Italy  
 Josef R. Patsch, MD, Innsbruck, Austria  
 Susan Patton, RN, Birmingham, MI  
 Federico Perosa, MD, Valhalla, NY  
 Lee H.C. Philip, Central Hong Kong, China  
 Karen Phillips, RN, Lima, OH  
 Richard E. Pratley, MD, Baltimore, MD  
 W. Ben Prewitt, Lexington, KY  
 Michelle A. Proulx, RN, CDE, St. Paul, MN  
 Jesus F. Qualle, MD, Monterrey, Mexico  
 Rafael Real, MD, Matamoros, Tamaulipas, Mexico  
 Pamela Reeves, Miami Shores, FL  
 Alice Ring, MD, MPH, Atlanta, GA  
 Connie Rockhill, Mankato, MN  
 Ignacio Rangel Rodriguez, MD, Monterrey, Mexico  
 Lydia Rodriguez, MD, Rio Piedras, PR  
 Ricardo Antonucci Roggero, MD, PCIA Buenos Aires, Argentina  
 Arnold Rosenberg, DMD, Yardley, PA  
 Sidney Rosenblatt, MD, Newport Beach, CA  
 Carlo M. Rotella, MD, Florence, Italy  
 Daniel M. Runyan, OD, Springfield, OH  
 H. Farouk Sadiq, MD, St. Louis, MO  
 Elmar P. Sakala, MD, Loma Linda, CA  
 Naquib A. Samaan, MD, PhD, Houston, TX  
 Jean Pierre Sauvanet, MD, Paris, France  
 Ulrich K. Schubart, MD, Bronx, NY  
 Morris Schwesitzer, MD, PhD, Montreal, Quebec, Canada  
 Hal Scofield, MD, Oklahoma City, OK  
 Clive Hamilton Sell, MD, Phoenix, AZ  
 David I. Shadowen, MD, Charleston, SC  
 Robert Francis Shaw, MD, San Francisco, CA  
 Jerry K. Shirah, Tallahassee, FL  
 Martin Silink, East Killara, Australia  
 Frank Singer, MD, Paterson, NJ  
 Patricia Skira, MS, PA, Pittsburgh, PA  
 Steven A. Smith, MD, Knoxville, TN  
 Jane M. Sparks, Atlanta, GA  
 Herb S. Steb, C.PED, MBA, Summit, NJ  
 Janice Steinmetz, RN, BSN, Memphis, TN  
 Stephen M. Stockberger, Indianapolis, IN  
 Serena Stoullwell, Bayside, NY  
 Tim Stryke, MD, Stoneham, MA  
 Andrew J. Szabo, MD, New York, NY  
 Ryosaburo Takaki, MD, Oita, Japan  
 Kazunori Tamada, MD, Boston, MA  
 Alfred Tenore, MD, New Orleans, LA  
 Timothy H. Tillo, DPM, Jacksonville, FL

Roberto Toccafondi, Florence, Italy  
Roxanne O. True, Elizabethtown, KY  
Kathleen Twitchell, RN, Plymouth, MN  
Motozumi Ukamito, Kyoto, Japan  
Eugenia Umberger, Centerport, PA  
Nina Vardi, MD, Haifa, Israel  
Apichati Vichayanrat, MD, Bangkok, Thailand  
Jean M. Waldt, RN, St. Paul, MN  
Shawnee Weir, MD, Cary, NC  
Karen Werner-Petak, DVM, Houston, TX  
Thomas B. Wiegmann, MD, Kansas City, KS  
Naomi L. Wienless, MS, Round Lake, IL  
Vivian L. Williams, RN, Durham, NC  
Kathryn Ann Wilson, MD, Oklahoma City, OK  
Koichi Yokono, Kobe, Japan  
Yasuaki Yoshidd, MD, Kobe, Japan  
Robert A. Young, MD, Hudson, FL  
Maury Zivitz, PhD, Indianapolis, IN

### **ABSTRACT DEADLINE**

The deadline for receipt of abstracts for the American Diabetes Association's 49th Annual Meeting and Scientific Sessions is 9 January 1989. Abstract reproduction forms are inserted in the October issues of *Diabetes Care* and *Diabetes*. Additional forms are available from the American Diabetes Association, Inc., National Service Center, 1660 Duke Street, Alexandria, VA 22314, ATTN: Division of Scientific and Medical Affairs.

### **FUTURE MEETINGS**

36th Postgraduate Course: 19–22 January 1989, Loew's Anatole Hotel, Dallas, Texas.

49th Annual Meeting: 1–6 June 1989, Detroit, Michigan.

### **1989 NEW MEXICO METABOLISM SYMPOSIUM**

The 1989 New Mexico Metabolism Symposium will be held 1–4 March 1989 in Taos, New Mexico. Twelve hours of CME credit will be offered to participants in the symposium, which will be cosponsored by the ADA New Mexico Affiliate, the Lovelace Foundation, and the American College of Surgeons. For more information contact Kathy Sikes, Lovelace Medical Foundation, 2441 Ridgcrest SE, Albuquerque, NM 87108. Tel.: (505) 262-7749.

### **DIABETES: PREPARING FOR THE FUTURE**

The Roanoke Chapter of the ADA Virginia Affiliate will sponsor the course "Diabetes: Preparing for the Future" on 28 April 1989 at the Sheraton Airport Inn in Roanoke, Virginia. The 1-day course is designed for dietitians, nurses, and educators involved with the care of patients with diabetes. Course topics include current and future developments in diabetes research, nutrition, and educational techniques. In addition, participants will be able to attend 3 out of 6 workshops that will focus on practical aspects of diabetes management. For more information call Janice MacLeod, RD, CDE: (703) 981-7518; or Cathy Engel: (703) 989-7871.

### **4TH ANNUAL INTERDISCIPLINARY CONFERENCE ON HYPERTENSION IN BLACKS**

The International Society on Hypertension in Blacks is accepting abstracts and award nominations for the 4th Annual

Interdisciplinary Conference on Hypertension in Blacks to be held 28 June through 2 July 1989 at the Kenyatta International Conference Center in Nairobi, Kenya. The conference, co-sponsored by ADA, will cover such topics as basic science as well as clinical and community research on hypertension in Blacks. Awards for Distinguished Research, Outstanding Community Service, and Outstanding Health Professional Student in Hypertension in Blacks will be presented at the conference. For information about conference registration and guidelines for abstract submissions and award nominations please contact Ms. Cecile Cate, Executive Director, International Society on Hypertension in Blacks, 69 Butler Street, SE, Atlanta, GA 30303.

### **IMPLICATIONS FOR THE CENTRAL NERVOUS SYSTEM**

The symposium sponsored by the National Institutes of Health "Molecular and Cellular Aspects of Insulin, IGF's, and Their Receptors: Implications for the CNS" will be held 23–24 January 1989 at the University of Florida, Gainesville, Florida. Participants include G.I. Bell, David Clemmons, Argiris Efstratiadis, Douglas Ishii, Steven Jacobs, Barry I. Posner, Jesse Roth, William Rutter, Axel Ullrich, and Judson Van Wyk. For more information, contact Derek LeRoith, MD, PhD, Diabetes Branch, National Institutes of Health, tel.: (301) 496-8090, or Mohan Raizada, PhD, Gainesville, FL, tel.: (904) 372-3791.

### **3RD INTERNATIONAL DIABETES CONFERENCE**

The 3rd International Diabetes Conference on Tissue-Specific Metabolic Alterations in Diabetes will be held 23–25 February 1989 in Florence, Italy. The conference will include invited lectures and several short communications, both oral and poster. The proceedings will be published by S. Karger, Basel. The scientific organizers of the conference are F. Belfiore, Catania, and G. M. Molinatti, Turin. For more information contact the Scientific Secretariat, 3rd International Diabetes Conference, c/o Boehringer-Biochemia-Robin, Via S. Ugguzzone, 5, 20126 Milan, Italy.

### **THERAPY WITH AMINO ACIDS AND ANALOGUES—1ST INTERNATIONAL CONGRESS**

"Therapy With Amino Acids and Analogues—1st International Congress" will be held 7–12 August 1989 at the University of Vienna, Vienna, Austria. Experimental topics will include resorption, handling, toxicity, and metabolism. Clinical topics will include neurotransmitters, aging, collagen disorders, excitatory amino acids, diabetes, and serotonin antagonists. For more information contact Barbara Bartosch or Dr. Gert Lubec, University of Vienna, Department of Paediatrics, A 1090 Vienna, Währinger Gürtel 18, Austria. Tel.: 0222-(Vienna)-4800-3232.

### **RESEARCH AND DEVELOPMENT AWARDS**

These awards provide a maximum of \$65,000/yr for 3 yr to support young investigators with 2–5 yr of postdoctoral research experience. The funds are to be divided between salary (restricted to a maximum of \$40,000/yr) and other grant support (restricted to a maximum of \$35,000/yr). Applicants must be U.S. citizens or permanent residents and hold independent faculty positions at U.S. university-affiliated institutions. Application deadline, 3 February 1989 for 1 July 1989 funding.

## **FEASIBILITY GRANTS**

These grants provide up to \$40,000/yr for 2 yr for new and innovative diabetes research. The funds are to be used for equipment, supplies, and salary for technical assistance. Established diabetes investigators must propose marked departures from current research. Investigators in other fields are encouraged to apply their expertise to diabetes research. Applicants must be U.S. citizens or permanent residents and be members of U.S. university-affiliated institutions. Application deadline, 3 February 1989 for 1 July 1989 funding.

## **LIONS CLUBS INTERNATIONAL CLINICAL RESEARCH PROGRAM IN DIABETIC EYE DISEASE**

This program supports clinical or applied research in diabetic retinopathy in the U.S. and abroad. Awards up to \$40,000/yr for 2 yr will be given to support new treatment regimens, epidemiology, and translation research. In addition, training

grants and grants for equipment will be considered. Application deadline is 3 February 1989 for 1 July 1989 funding.

## **CLINICAL RESEARCH GRANT PROGRAM**

Grants of up to \$50,000/yr are provided for 3 yr for studies that directly involve humans. In vitro research on human blood or tissue samples to measure effects of environmentally induced (e.g., diet, drugs) changes qualifies as clinical research under this program; simply using human tissues for laboratory research does not qualify. The funds may be used for equipment, supplies, and/or salary (excluding principal investigator's salary). Applicants must be U.S. citizens or permanent residents and hold faculty-level appointments at U.S. university-affiliated institutions. Application deadline is 3 February 1989 for 1 July 1989 funding. Application forms for all programs are available by contacting the American Diabetes Association National Service Center, Division of Scientific and Medical Affairs, 1660 Duke Street, Alexandria, VA 22314. Tel.: (703) 549-1500.
